# Supplementary material for: Synthesis, structure and photoluminescence properties of three copper(i) iodide based inorganic–organic hybrid structures with pyrazine derivatives
Source: Royal Society of Chemistry journal article supplement (doi:10.1039/d0nj02341h), 2020-01-01
Supplement: d0nj02341h1.pdf [file d0nj02341h1.pdf]

## Supporting Information

### Synthesis, structure and photoluminescence properties of three copper(I) iodide based inorganic-organic hybrid structures with pyrazine derivatives

Chanchan Xu,<sup>a</sup> Le Lv,<sup>a</sup> Dawei Luo<sup>\*,a</sup> and Wei Liu<sup>\*,b</sup>

<sup>a</sup> Hoffmann Institute of Advanced Materials, Shenzhen Polytechnic, 7098 Liuxian Blvd, Nanshan District, Shenzhen, 518055, China.

<sup>b</sup> School of Chemical Engineering and Technology, Sun Yat-Sen University, Zhuhai 519082, PR China

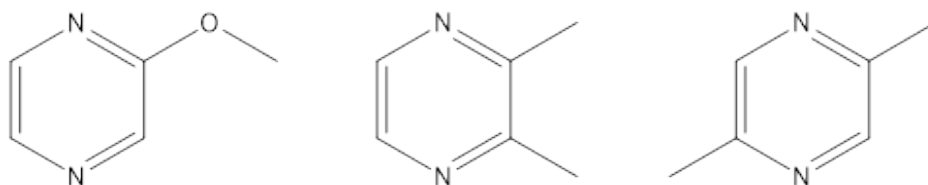

Figure S1. Structure plot of 2-*mo-pz* (left), 2,3-*dm-pz* (middle) and 2,5-*dm-pz* (right)

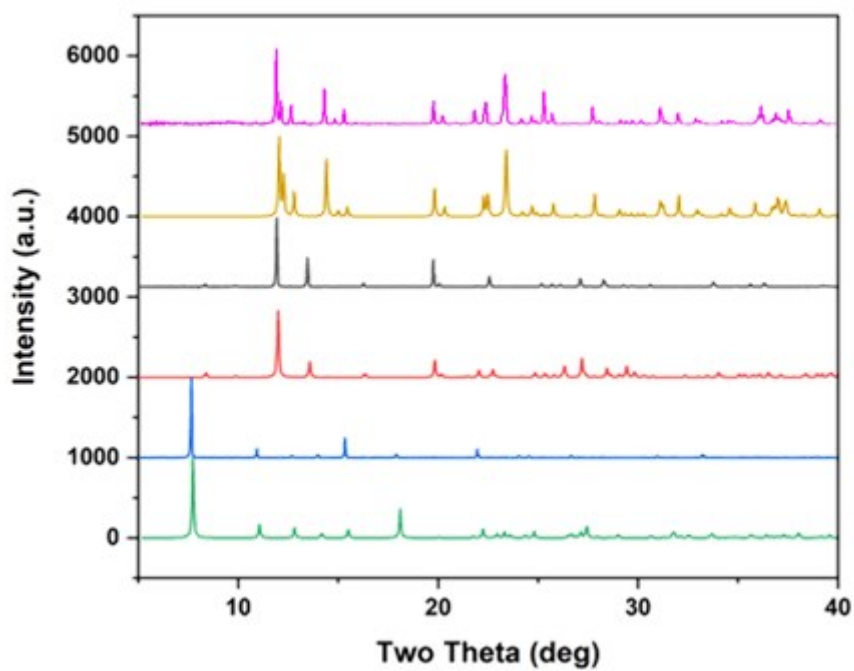

Figure S2. PXRD patterns. From bottom to top: simulated **1**, as made **1**, simulated **2**, as made **2**, simulated **3**, as made **3**.

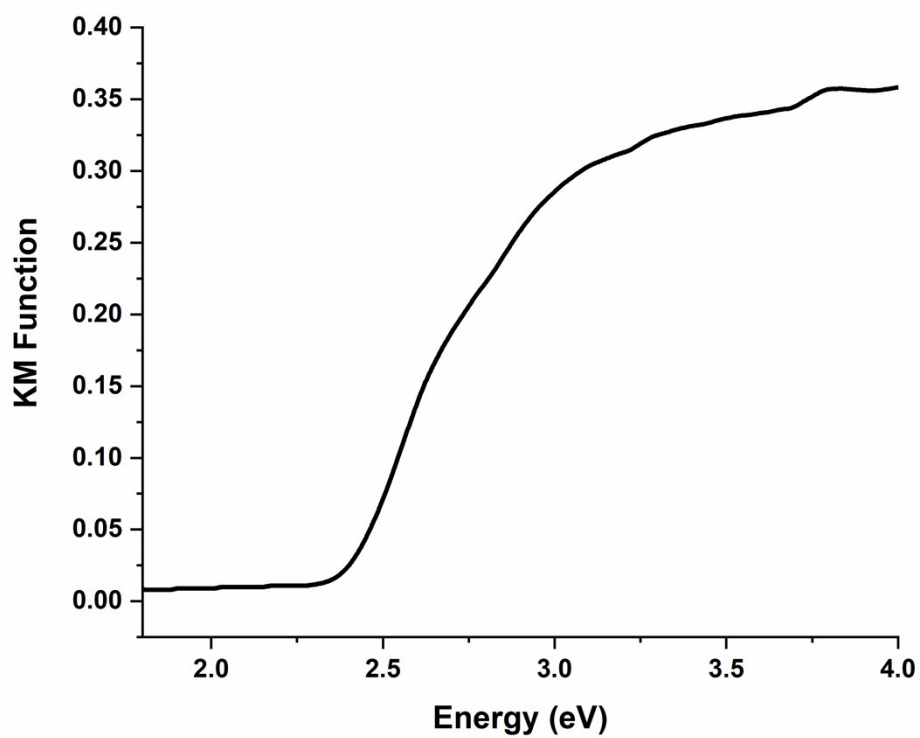

Figure S3. UV absorption plot of **1**.

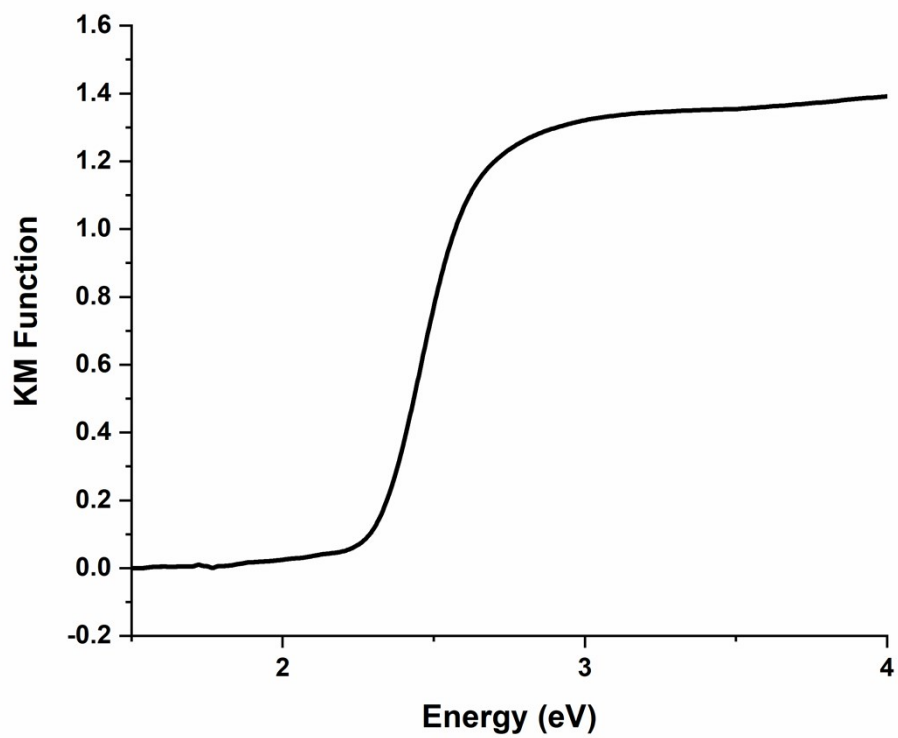

Figure S4. UV absorption plot of **2**.

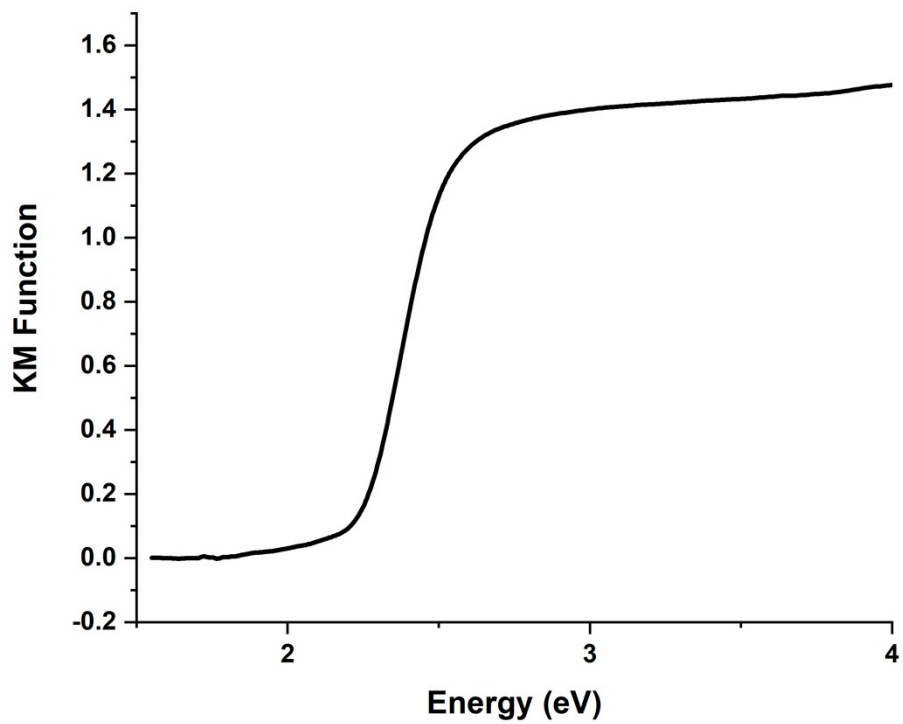

Figure S5. UV absorption plot of **3**.

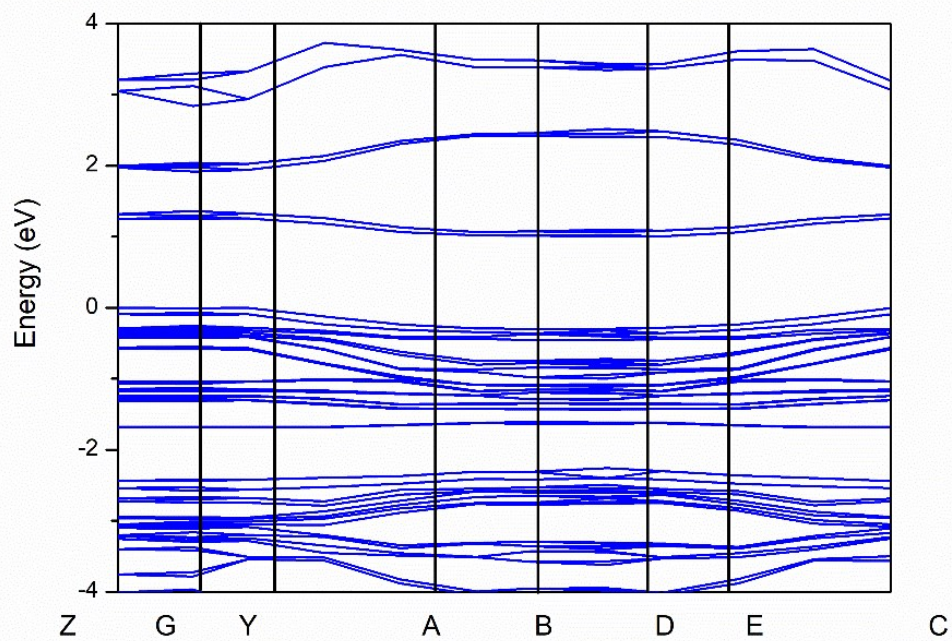

Figure S6. Calculated band structure of **1**.

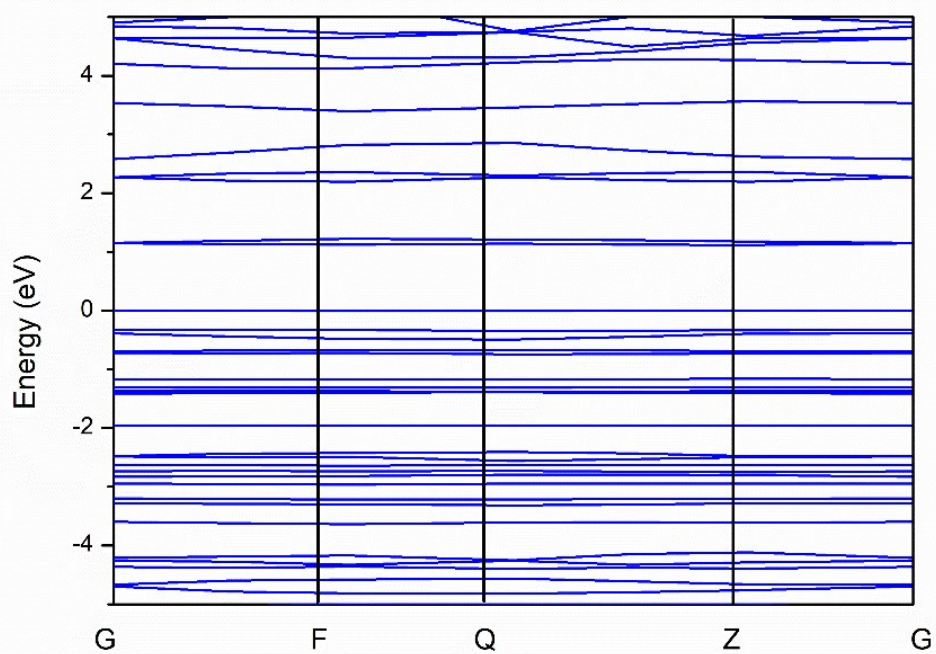

Figure S7. Calculated band structure of **2**.

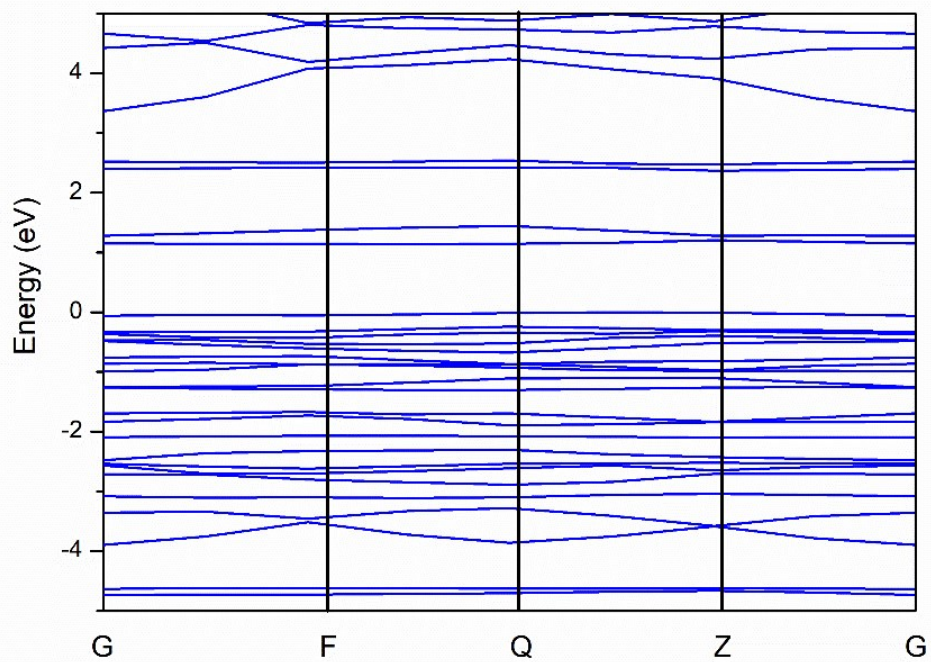

Figure S8. Calculated band structure of **3**.

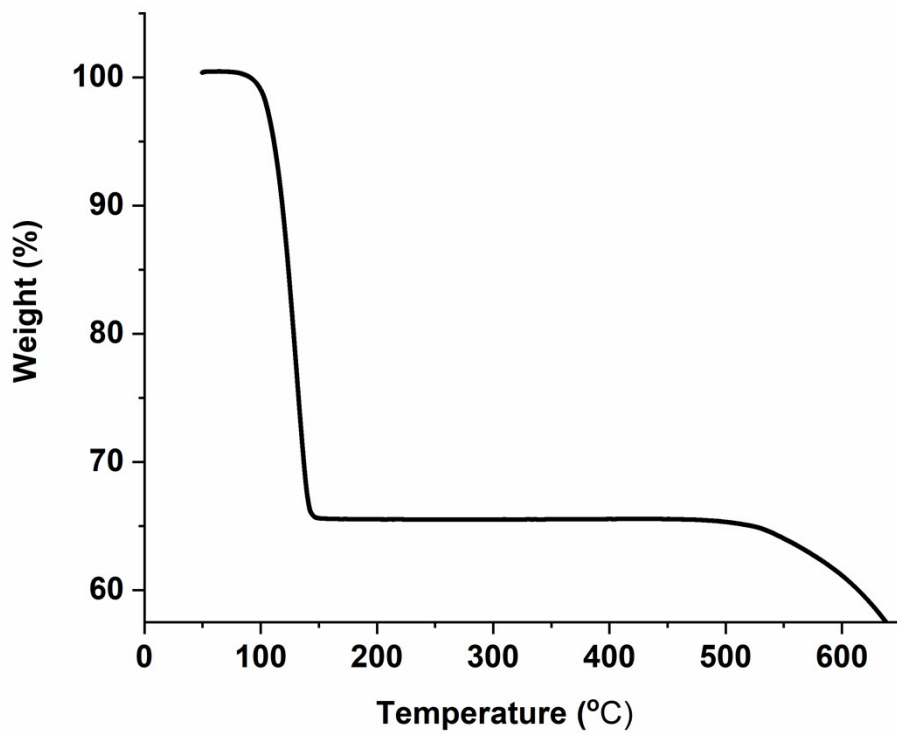

Figure 9. TGA plot of **1**.

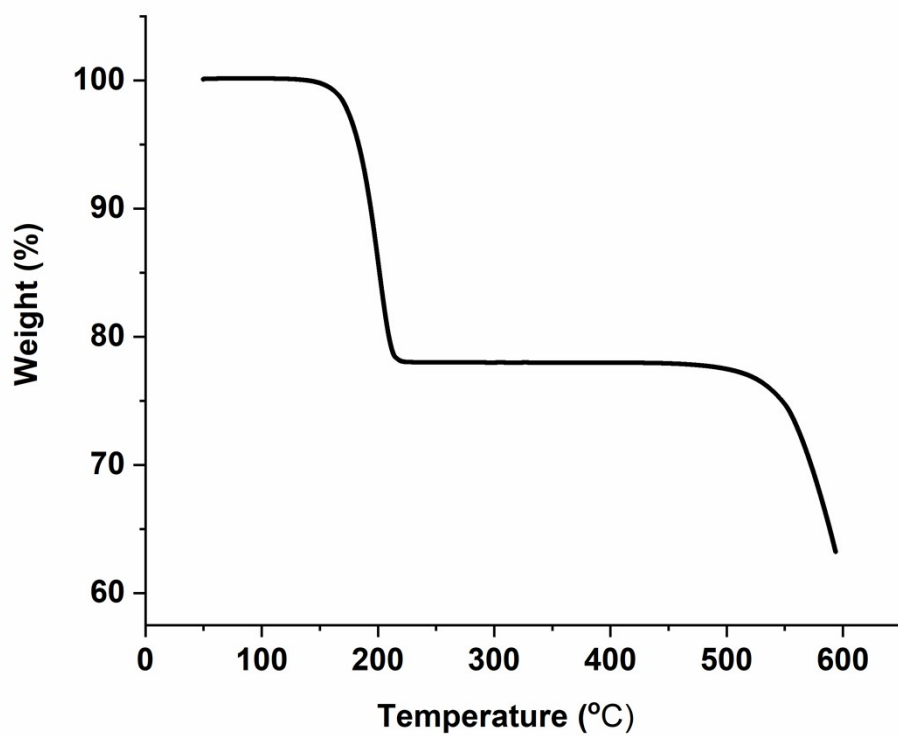

Figure 10. TGA plot of 2.

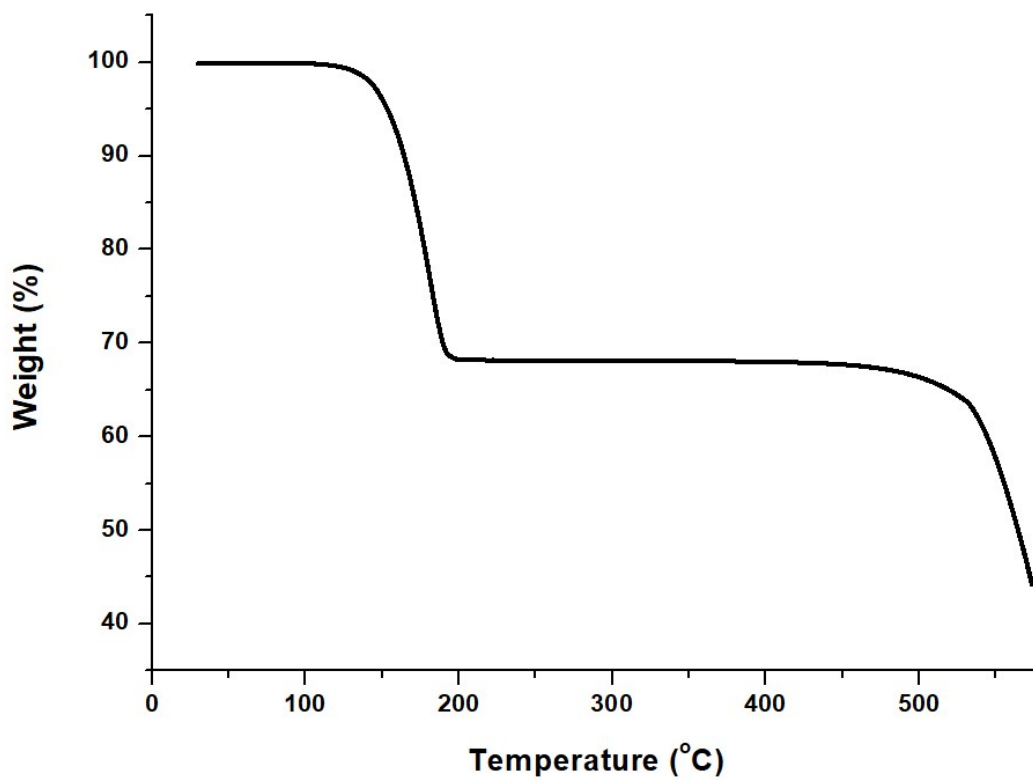

Figure 11. TGA plot of 3.

Table S1. The experimental and theoretical weight loss of **1**, **2** and **3**

| Compound | Experimental weight loss (%) | Theoretical weight loss (%) |
|----------|------------------------------|-----------------------------|
| <b>1</b> | 35.4                         | 36.5                        |
| <b>2</b> | 23.3                         | 22.4                        |
| <b>3</b> | 34.4                         | 36.5                        |

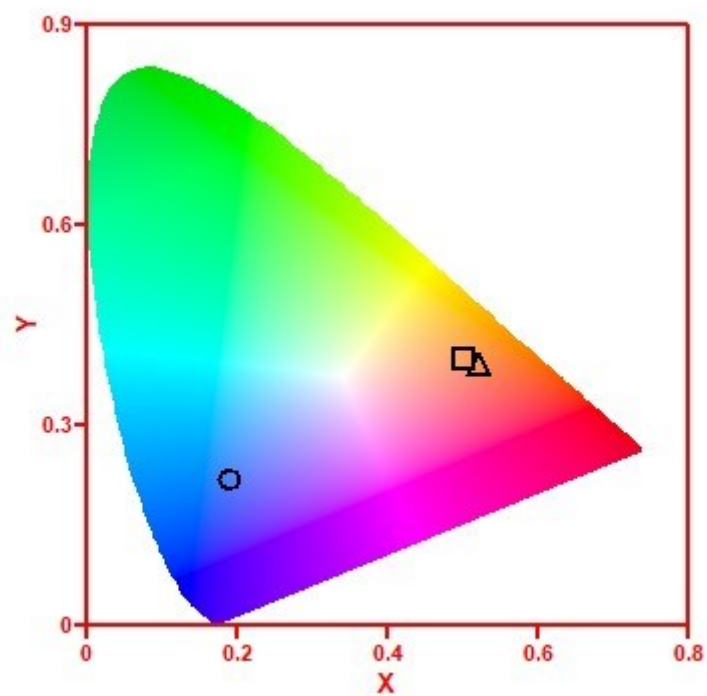

Figure S12. CIE coordinates of **1** (circle) **2** (square) and **3** (triangle).

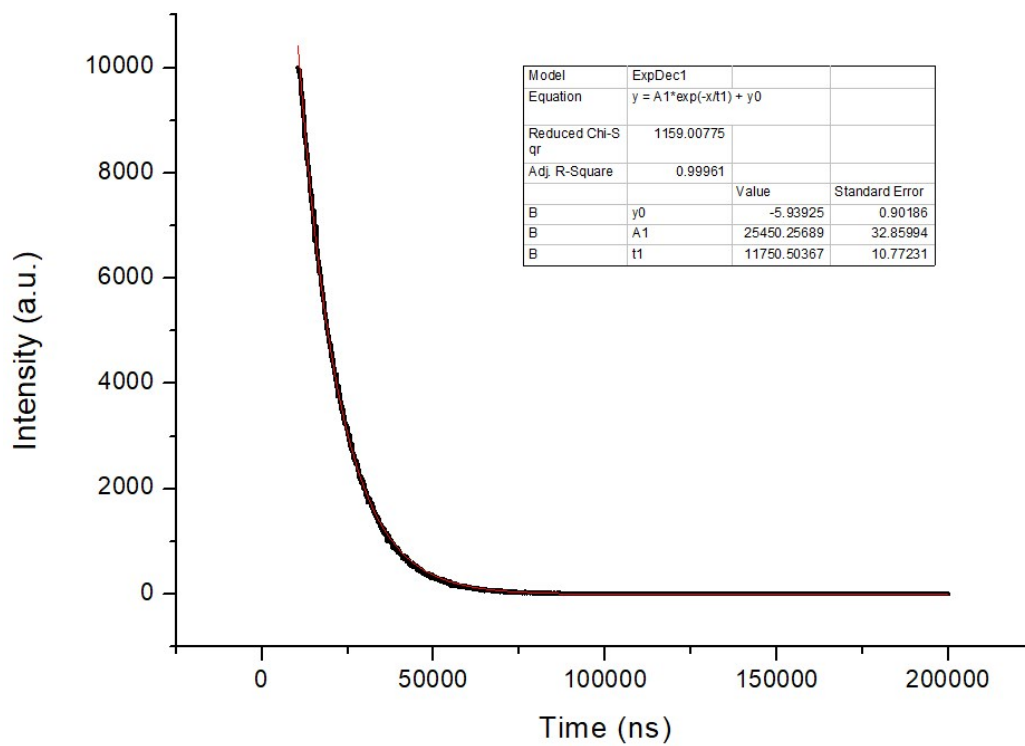

Figure S13. Luminescence decay curve of **1**.

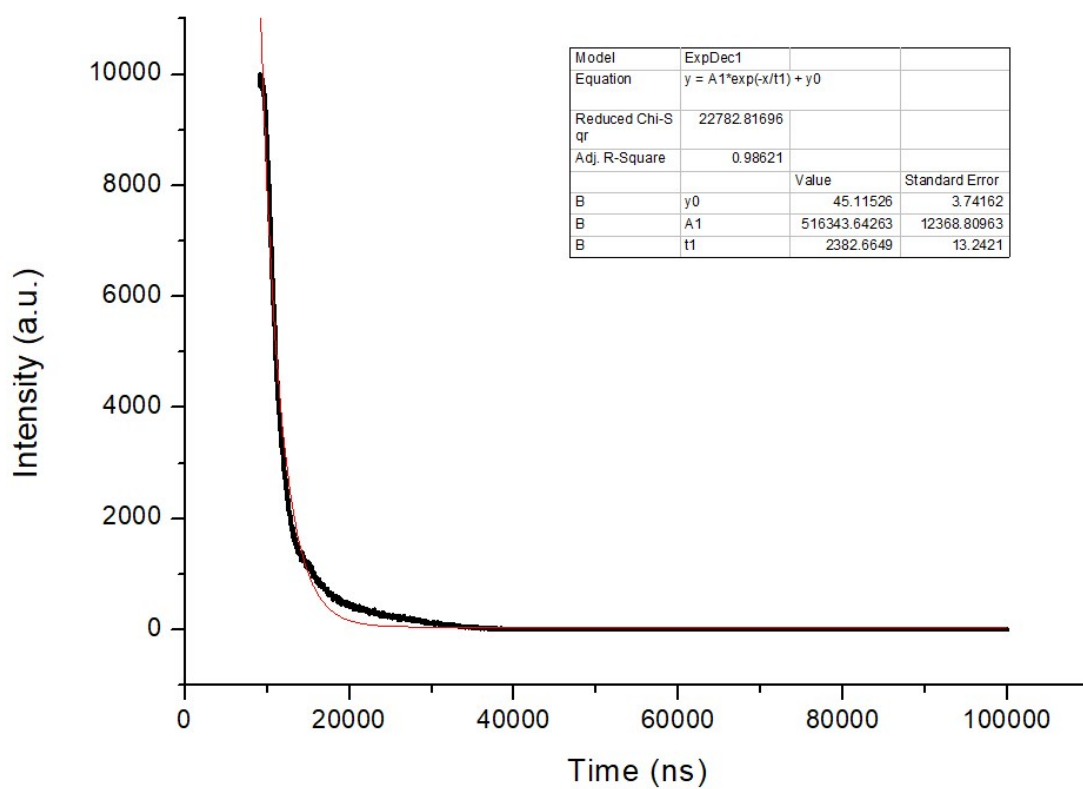

Figure S14. Luminescence decay curve of **2**.



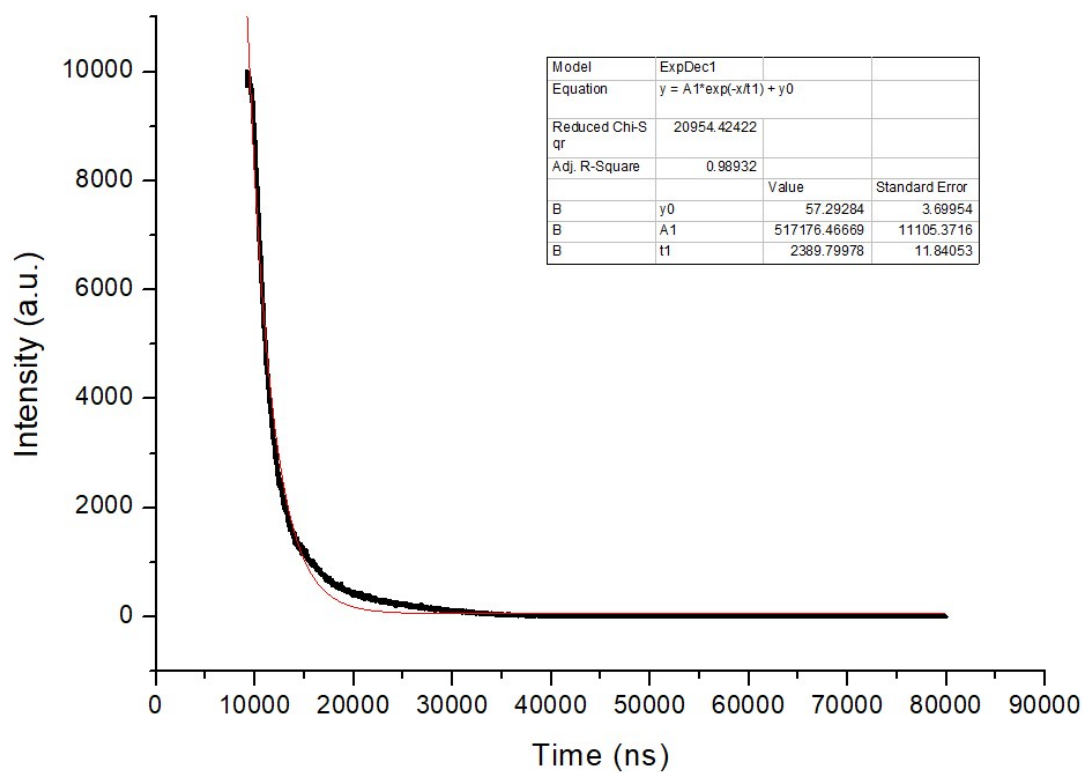

Figure S15. Luminescence decay curve of **3**

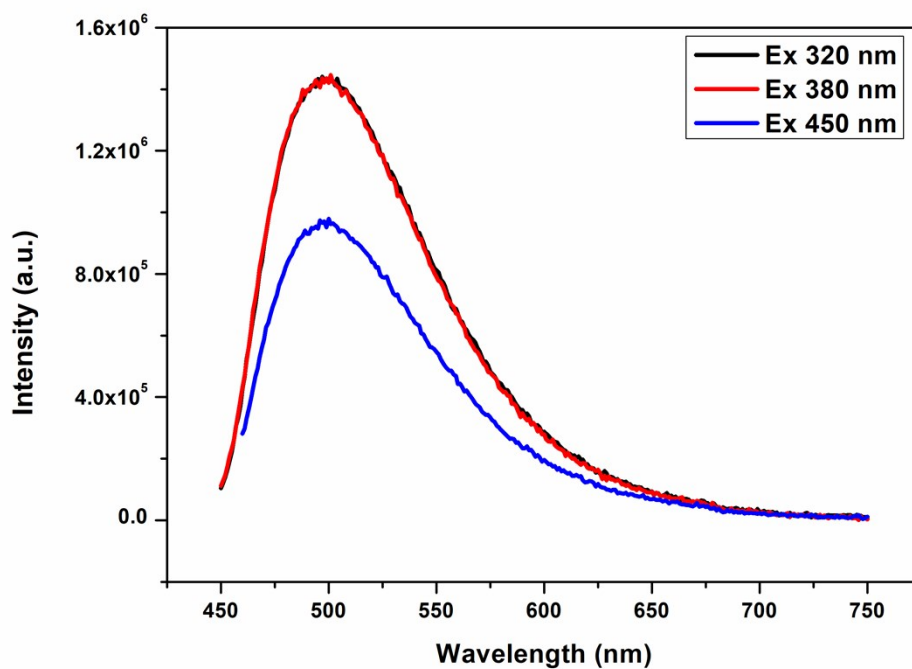

Figure S16. Emission spectra under different excitation wavelengths of **1**.

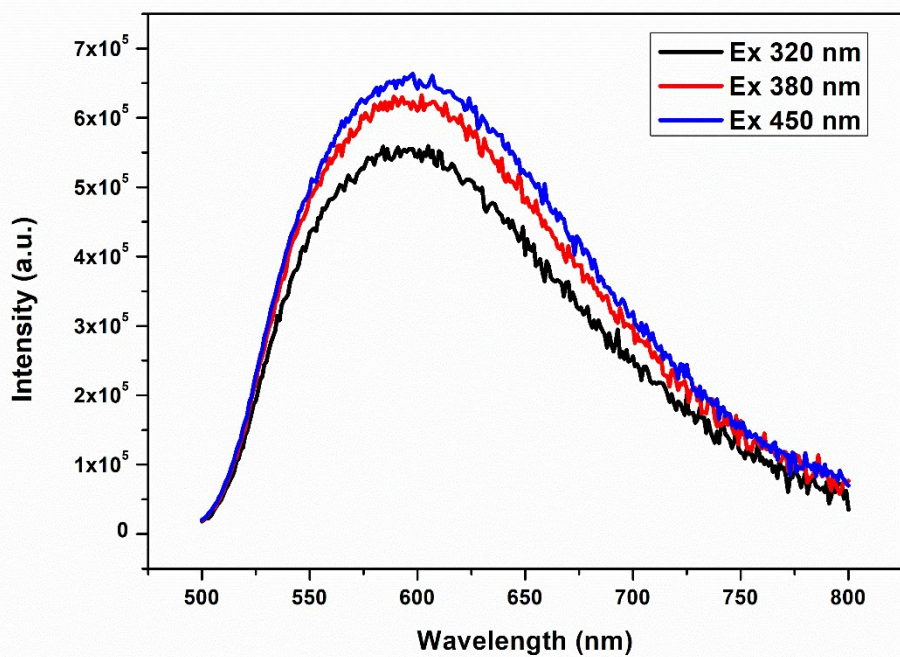

Figure S17. Emission spectra under different excitation wavelengths of **2**.

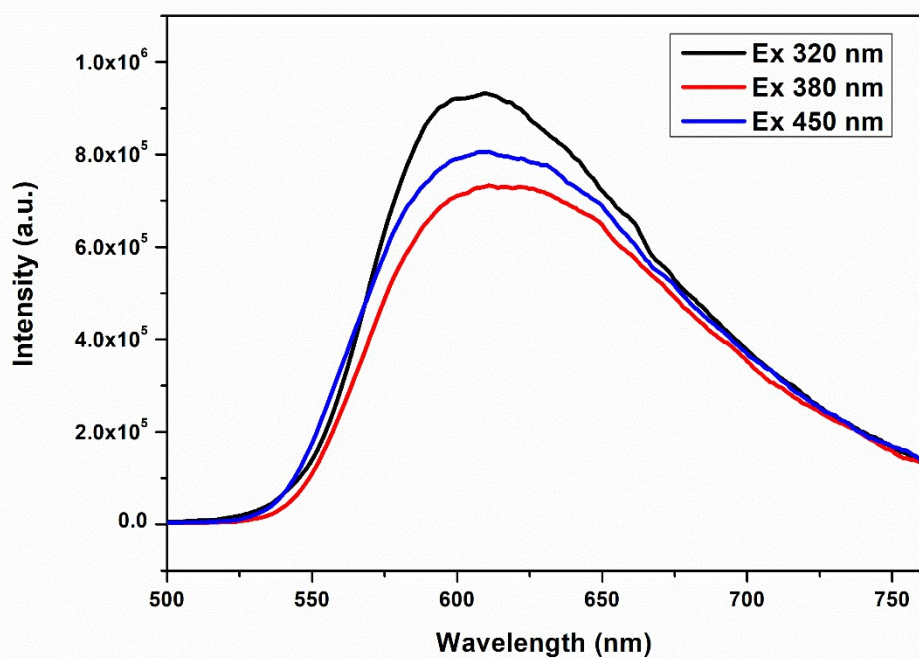

Figure S18. Emission spectra under different excitation wavelengths of **3**.

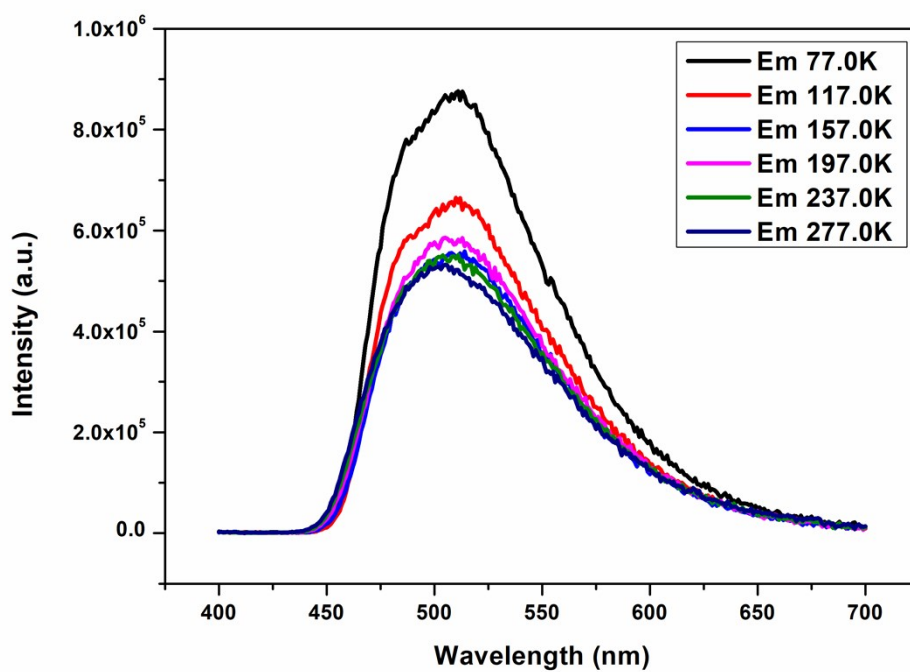

Figure S19. Emission spectra under different temperatures of **1**.

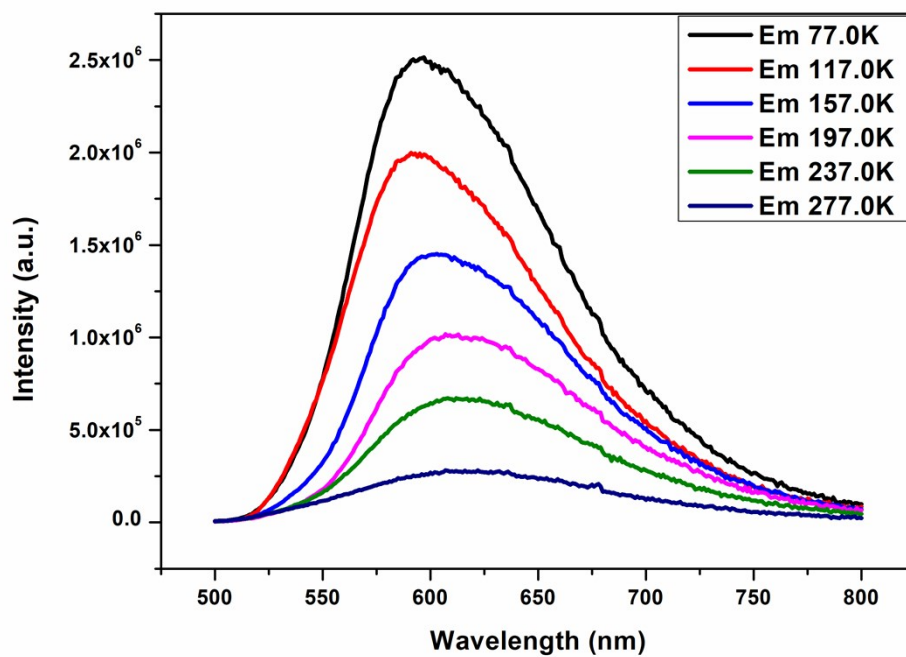

Figure S20. Emission spectra under different temperatures of **2**.

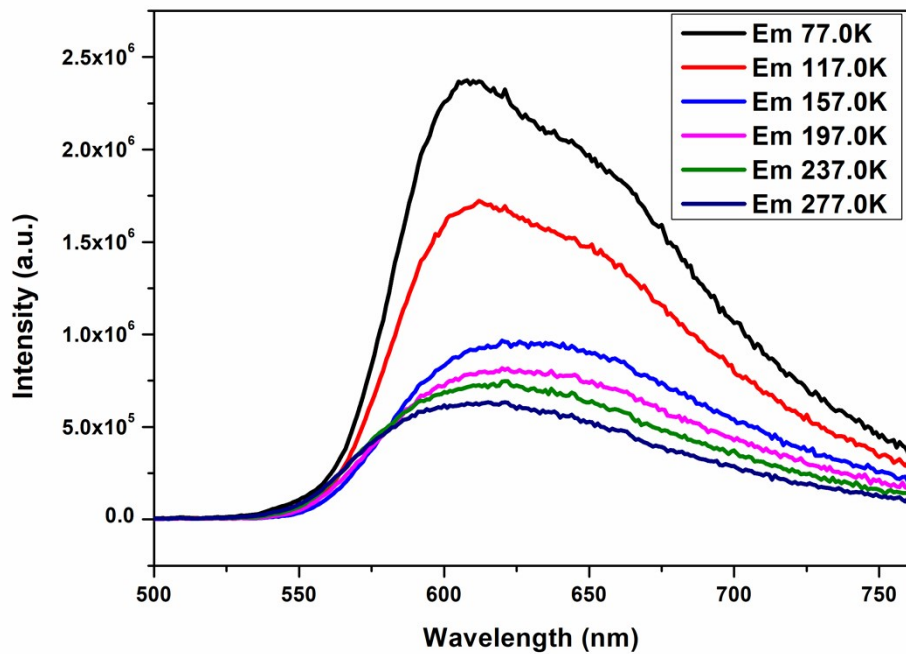

Figure S21. Emission spectra under different temperatures of **3**.
